# Supplementary material for: Normal weight obesity and physical fitness in Chinese university students: an overlooked association
Source: PubMed Central journal article supplement (PMC6278052; doi:10.1186/s12889-018-6238-3), 2018-12-04
Supplement: 12889_2018_6238_MOESM1_ESM.pdf [file 12889_2018_6238_MOESM1_ESM.pdf]

## Additional file 1: Participants characteristics stratified by gender and four weight group (Mean $\pm$ SD).

| Variables                | Men (n=205)      |                   |                   |                   | Women (n=178)    |                  |                  |                  |
|--------------------------|------------------|-------------------|-------------------|-------------------|------------------|------------------|------------------|------------------|
|                          | UW(n=29)         | NWNO(n=97)        | NWO(n=28)         | OW(n=51)          | UW(n=64)         | NWNO(n=57)       | NWO(n=49)        | OW(n=8)          |
| Age (year)               | 20.1 $\pm$ 1.4   | 20.2 $\pm$ 1.4    | 20.9 $\pm$ 1.8    | 21 $\pm$ 1.6      | 20.1 $\pm$ 1.7   | 19.7 $\pm$ 1.6   | 20.6 $\pm$ 1.5   | 20 $\pm$ 1.5     |
| BH (cm)                  | 174.6 $\pm$ 6.1  | 175.8 $\pm$ 6.5   | 171.5 $\pm$ 6.8   | 172.8 $\pm$ 6     | 162.1 $\pm$ 5.5  | 162.9 $\pm$ 6.1  | 160 $\pm$ 5.1    | 162.7 $\pm$ 5.6  |
| BW (Kg)                  | 53.2 $\pm$ 4.5   | 65.3 $\pm$ 6.6    | 66.1 $\pm$ 6.2    | 78.2 $\pm$ 7.6    | 46.3 $\pm$ 3.7   | 53.9 $\pm$ 5.5   | 55.5 $\pm$ 4.6   | 65.5 $\pm$ 4.6   |
| WC (cm)                  | 67 $\pm$ 3.1     | 75 $\pm$ 4.4      | 79.7 $\pm$ 4      | 87.3 $\pm$ 5.9    | 63.6 $\pm$ 3.5   | 68.1 $\pm$ 4.4   | 73.2 $\pm$ 4.5   | 81.3 $\pm$ 5.1   |
| VFA (cm <sup>2</sup> )   | 12.1 $\pm$ 6.5   | 28.5 $\pm$ 13.7   | 59.7 $\pm$ 13.3   | 68.8 $\pm$ 12.2   | 38.9 $\pm$ 9.6   | 52.4 $\pm$ 9.1   | 73.2 $\pm$ 14.3  | 78.9 $\pm$ 0.2   |
| Fat %                    | 9.6 $\pm$ 2.8    | 12.3 $\pm$ 3.8    | 23.1 $\pm$ 3.4    | 23.6 $\pm$ 5.2    | 21.7 $\pm$ 4.5   | 24.4 $\pm$ 2.6   | 32.1 $\pm$ 2.3   | 36.2 $\pm$ 3     |
| BMI (kg/m <sup>2</sup> ) | 17.4 $\pm$ 0.9   | 21.1 $\pm$ 1.4    | 22.5 $\pm$ 1.2    | 26.2 $\pm$ 1.7    | 17.6 $\pm$ 0.7   | 20.3 $\pm$ 1.3   | 21.7 $\pm$ 1.3   | 25 $\pm$ 0.5     |
| SMM/BH (Kg/m)            | 15.3 $\pm$ 1.1   | 18.3 $\pm$ 1.5    | 16.5 $\pm$ 1.5    | 19.5 $\pm$ 2      | 11.9 $\pm$ 1     | 13.5 $\pm$ 1.1   | 12.6 $\pm$ 0.9   | 13.9 $\pm$ 0.9   |
| DBP (mmHg)               | 70.7 $\pm$ 6.8   | 69.5 $\pm$ 7.0    | 71.9 $\pm$ 8.8    | 72.1 $\pm$ 8.0    | 68.1 $\pm$ 7.8   | 66.9 $\pm$ 6.1   | 72.1 $\pm$ 8.4   | 71.1 $\pm$ 7.2   |
| SBP (mmHg)               | 117.2 $\pm$ 10.1 | 120.4 $\pm$ 9.5   | 119.6 $\pm$ 10.0  | 126.1 $\pm$ 9.4   | 105.9 $\pm$ 8.3  | 104.9 $\pm$ 8.3  | 112.3 $\pm$ 10.7 | 110.2 $\pm$ 5.7  |
| HR                       | 78.3 $\pm$ 12.7  | 72.7 $\pm$ 9.8    | 73.7 $\pm$ 12.5   | 73.1 $\pm$ 10.9   | 77.7 $\pm$ 11.4  | 75.5 $\pm$ 9.4   | 75.8 $\pm$ 9.7   | 73.8 $\pm$ 8.3   |
| PA (Mets*H/wk)           | 27.9 $\pm$ 16.3  | 30.4 $\pm$ 10.4   | 28 $\pm$ 13       | 35.1 $\pm$ 14.3   | 23.5 $\pm$ 14.5  | 21.7 $\pm$ 8.6   | 27.5 $\pm$ 15.3  | 30.1 $\pm$ 10.4  |
| Anderson test (m)        | 1103 $\pm$ 90.4  | 1145.8 $\pm$ 70.2 | 1045.9 $\pm$ 95.4 | 1049.2 $\pm$ 78.3 | 923.3 $\pm$ 97.4 | 967.8 $\pm$ 61.3 | 906.6 $\pm$ 66.5 | 866.5 $\pm$ 49.3 |
| CMJ (cm)                 | 53.5 $\pm$ 7.5   | 55 $\pm$ 7.6      | 44.9 $\pm$ 7.5    | 48.6 $\pm$ 7.7    | 34.9 $\pm$ 8     | 39.8 $\pm$ 8     | 33.7 $\pm$ 5.9   | 31.7 $\pm$ 5.2   |
| 5mSR (s)                 | 19.3 $\pm$ 1.4   | 18.7 $\pm$ 1      | 20 $\pm$ 0.9      | 19.6 $\pm$ 1      | 21.7 $\pm$ 1.4   | 21.1 $\pm$ 1.1   | 22.4 $\pm$ 1.3   | 22.5 $\pm$ 1.3   |

Abbreviations: UW=Under Weight; NWNO=Normal Weight Non-obese; NWO=Normal Weight Obese; OW=Over-weight.

BH=Body height; BW=Body weight; WC=Waist circumference; VFA=Visceral fat area; Fat%=Body fat percentage; BMI=Body Mass Index; SMM=Skeletal muscle mass; DBP=Diastolic blood pressure; SBP=Systolic blood pressure; HR=Heart rate; PA=Physical activity; CMJ=Countermovement jump; 5mSR=5  $\times$  5-m shuttle run test.
